# Supplementary material for: ppiTrim: constructing non-redundant and up-to-date interactomes
Source: Oxford University Press journal article supplement (doi:10.1093/database/bar036), 2011-01-01
Supplement: bar036_Supplementary_Data.zip [file bar036_Supplementary_Data.zip]

# **Supplementary Materials for ‘ppiTrim: constructing non-redundant and up-to-date interactomes’**

Aleksandar Stojmirović, and Yi-Kuo Yu

National Center for Biotechnology Information  
National Library of Medicine  
National Institutes of Health  
Bethesda, MD 20894  
United States

Supplementary Table 1: Description of ppiTrim MITAB 2.6 columns

| Column | Short Name            | Description                                                                                   | Example                                                                                                                                             |
|--------|-----------------------|-----------------------------------------------------------------------------------------------|-----------------------------------------------------------------------------------------------------------------------------------------------------|
| 1      | uidA                  | Smallest Gene ID of the interactor A* <sup>†</sup>                                            | entrezgene/locuslink:854647                                                                                                                         |
| 2      | uidB                  | Smallest Gene ID of the interactor B*                                                         | entrezgene/locuslink:855136                                                                                                                         |
| 3      | altA                  | All gene IDs of the interactor A*                                                             | entrezgene/locuslink:854647                                                                                                                         |
| 4      | altB                  | All gene IDs of the interactor B*                                                             | entrezgene/locuslink:855136                                                                                                                         |
| 5      | aliasA                | All canonical gene symbols and integer CROGIDs of interactor A                                | entrezgene/locuslink:BNR1 <br>icrogid:2105284                                                                                                       |
| 6      | aliasB                | All canonical gene symbols and integer CROGIDs of interactor B                                | entrezgene/locuslink:MYO5 <br>icrogid:3144798                                                                                                       |
| 7      | method                | PSI-MI term for interaction detection method                                                  | MI:0018(two hybrid)                                                                                                                                 |
| 8      | author                | First author name(s) of the publication in which this interaction has been shown <sup>‡</sup> | Tong AH [2002] tong-2002a-3                                                                                                                         |
| 9      | pmids                 | Pubmed ID(s) of the publication in which this interaction has been shown                      | pubmed:11743162                                                                                                                                     |
| 10     | taxA                  | NCBI Taxonomy identifier for interactor A                                                     | taxid:4932(Saccharomyces cerevisiae)                                                                                                                |
| 11     | taxB                  | NCBI Taxonomy identifier for interactor B                                                     | taxid:4932(Saccharomyces cerevisiae)                                                                                                                |
| 12     | interactionType       | PSI-MI term for interaction type                                                              | MI:0407(direct interaction)                                                                                                                         |
| 13     | sourcedb              | PSI-MI terms for source databases <sup>‡</sup>                                                | MI:0000(MPACT) MI:0463(grid) <br>MI:0465(dip) MI:0469(intact)                                                                                       |
| 14     | interactionIdentifier | A list of interaction identifiers*                                                            | ppiTrim:tyuGkSOK231dh3YnSi6GbczJCFE= <br>MPACT:8233 dip:DIP-11198E grid:147506 <br>intact:EBI-601565 intact:EBI-601728 <br>irigid:288990 edgetype:X |
| 15     | confidence            | A list of ppiTrim confidence scores <sup>•</sup>                                              | maxsources:2 dmconsistency:full <br>conflicts:S3oaiXt5tA4vVrUsO1rc1TA9krk=                                                                          |
| 16     | expansion             | Either 'none' for binary interactions or 'bi-partite' for subunits of complexes               | none                                                                                                                                                |
| 17     | biologicalRoleA       | PSI-MI term(s) for the biological role of interactor A <sup>‡</sup>                           | MI:0499(unspecified role)                                                                                                                           |
| 18     | biologicalRoleB       | PSI-MI term(s) for the biological role of interactor B <sup>‡</sup>                           | MI:0499(unspecified role)                                                                                                                           |
| 19     | experimentalRoleA     | PSI-MI term(s) for the experimental role of interactor A <sup>‡</sup>                         | MI:0496(bait) MI:0498(preyl) <br>MI:0499(unspecified role)                                                                                          |
| 20     | experimentalRoleB     | PSI-MI term(s) for the experimental role of interactor B <sup>‡</sup>                         | MI:0496(bait) MI:0498(preyl) <br>MI:0499(unspecified role)                                                                                          |
| 21     | interactorTypeA       | PSI-MI term for the type of interactor A (either 'protein' or 'protein complex')              | MI:0326(protein)                                                                                                                                    |
| 22     | interactorTypeB       | PSI-MI term for the type of interactor B (always 'protein')                                   | MI:0326(protein)                                                                                                                                    |
| 29     | hostOrganismTaxid     | NCBI Taxonomy identifier for the host organism                                                | taxid:4932(Saccharomyces cerevisiae)                                                                                                                |
| 31     | creationDate          | Date when ppiTrim was run                                                                     | 2011/05/11                                                                                                                                          |
| 32     | updateDate            | Date when ppiTrim was run                                                                     | 2011/05/11                                                                                                                                          |
| 35     | checksumInteraction   | ppiTrim ID for an interaction                                                                 | ppiTrim:tyuGkSOK231dh3YnSi6GbczJCFE=                                                                                                                |
| 36     | negative              | Always 'false'                                                                                | false                                                                                                                                               |

The above table shows short descriptions for the columns of lines output by ppiTrim with examples. The columns that are not used by ppiTrim (– output) are omitted. List of items are always separated by the | character (without any intervening spaces). This description only applies to ppiTrim output; the full PSI-MI 2.6 TAB format description can be found at <http://code.google.com/p/psimi/wiki/PsimiTab26Format> Notes: \*An interactor may be associated with several Gene IDs. In that case the smallest one is written in uid columns while the entire list is shown in alt columns. <sup>†</sup>Interactor A may be used to denote a protein complex. In that case the uidA is of the form complex:<ppiTrim ID>, while altA and aliasA are left empty. <sup>‡</sup>Multiple items are possible, originating from all source records contributing to the consolidated interaction. \*First ID is always the ppiTrim ID for the consolidated interaction, followed by the original IDs for all contributing interactions and their integer RIGIDs from iRefIndex. The final item is the edge type code. <sup>•</sup>maxsources: an estimate of the maximal number of independent experiments contributing to the consolidated interaction; dmconsistency: consistency of contributing detection method terms. Values are one of *invalid* (no method terms present), *single* (only one method term), *min* (minimum term found but not maximum), *max* (maximum term found but not minimum), and *full* (both minimum and maximum term present in subcluster); conflicts: ppiTrim IDs of consolidated interactions with detection method term in conflict with the current one.

Supplementary Table 2: Remapping of obsolete PSI-MI terms

| Original Term                                        | Mapped Term                               | Notes |
|------------------------------------------------------|-------------------------------------------|-------|
| MI:0021 colocalization by fluorescent probes cloning | MI:0428 imaging technique                 |       |
| MI:0022 colocalization by immunostaining             | MI:0428 imaging technique                 | *     |
| MI:0023 colocalization/visualisation technologies    | MI:0428 imaging technique                 | *     |
| MI:0025 copurification                               | MI:0401 biochemical                       |       |
| MI:0059 gst pull down                                | MI:0096 pull down                         |       |
| MI:0061 his pull down                                | MI:0096 pull down                         |       |
| MI:0079 other biochemical technologies               | MI:0401 biochemical                       |       |
| MI:0109 tap tag coimmunoprecipitation                | MI:0676 tandem affinity purification      |       |
| MI:0045 experimental interaction detection           | MI:0492 in vitro                          | †     |
| MI:0493 in vivo                                      | MI:0493 in vivo                           | †     |
| MI:0000 coip coimmunoprecipitation                   | MI:0019 coimmunoprecipitation             | *     |
| MI:0000 elisa enzyme-linked immunosorbent assay      | MI:0411 enzyme linked immunosorbent assay | *     |

\* Interaction type is also adjusted to MI:0403 as recommended in `psi-mi.obo`; † HPRD terms are treated as a special case, see main text; \* MPPI interactions in the human dataset.

Supplementary Table 3: Mapping PTM labels from BioGRID into PSI-MI terms

| Original Term          | Mapped Term                        |
|------------------------|------------------------------------|
| Acetylation            | MI:0192 acetylation reaction       |
| Deacetylation          | MI:0197 deacetylation reaction     |
| Demethylation          | MI:0871 demethylation reaction     |
| Dephosphorylation      | MI:0203 dephosphorylation reaction |
| Deubiquitination       | MI:0204 deubiquitination reaction  |
| Glucosylation          | MI:0559 glycosylation reaction     |
| Methylation            | MI:0213 methylation reaction       |
| Nedd(Rub1)ylation      | MI:0567 neddylation reaction       |
| No Modification        | MI:0414 enzymatic reaction         |
| Phosphorylation        | MI:0217 phosphorylation reaction   |
| Prenylation            | MI:0211 lipid addition             |
| Proteolytic Processing | MI:0570 protein cleavage           |
| Ribosylation           | MI:0557 adp ribosylation reaction  |
| Sumoylation            | MI:0566 sumoylation reaction       |
| Ubiquitination         | MI:0220 ubiquitination reaction    |

Supplementary Table 4: Processing source interactions (RIGIDs)

| Species                | Initial | Without Gene ID | Retained | With Mapped Gene ID |
|------------------------|---------|-----------------|----------|---------------------|
| <i>S. cerevisiae</i>   | 186530  | 1272            | 79931    | 591                 |
| <i>H. sapiens</i>      | 138570  | 1917            | 84860    | 7158                |
| <i>D. melanogaster</i> | 46925   | 4988            | 39200    | 2176                |

Statistics of initial processing of raw interactions from in terms of iRefIndex RIGIDs. A RIGID for an interaction is a unique hash derived from its interactants' sequences (with order not significant). Thus, multiple interactions with the same interactants share the same RIGID. Shown are the initial number, number removed due to missing Gene ID, total number of retained and the number retained containing at least one interactant with mapped Gene ID. Compared to Table 2 in the main text, this table does not contain a column showing the number of removed RIGIDs due to filtering criteria. This is because the `ppiTrim` filtering routine operates on raw interactions (corresponding to a single record from a source database) and some RIGIDs would be associated with both accepted and removed raw interactions.

Supplementary Table 5: Mapping CROGID identifiers from iRefIndex into Gene IDs: details

| Species                | I     | V  | O  | R    | P   | T    | M  | G   | S   | B   |
|------------------------|-------|----|----|------|-----|------|----|-----|-----|-----|
| <i>S. cerevisiae</i>   | 5552  | 0  | 0  | 607  | 95  | 461  | 0  | 26  | 21  | 386 |
| <i>H. sapiens</i>      | 11428 | 11 | 0  | 2615 | 155 | 2017 | 71 | 754 | 429 | 0   |
| <i>D. melanogaster</i> | 7780  | 0  | 30 | 1569 | 18  | 814  | 2  | 124 | 440 | 0   |

Detailed statistics of mapping CROGIDs into Gene IDs. All numbers denote CROGIDs: directly mapped to valid Gene IDs in the iRefIndex file (I); directly mapped to Gene IDs but the Gene IDs were updated during validation (V); directly mapped to obsolete Gene IDs (O); not directly mapped to Gene IDs – total orphans (R); orphans with PDB accession as a primary ID (P); orphans with Uniprot accession as a primary ID (T); additionally mapped to a valid Gene ID using mapping.txt file from iRefIndex (M); additionally mapped to a valid Gene ID using a direct reference from Uniprot record (G); additionally mapped to a valid Gene ID using a gene name from Uniprot record (S); additionally mapped to a Gene ID that was not valid (B).

Supplementary Table 6: Randomly sampled deflated complexes from high throughput publications

| ppiTrim Complex ID           | Sources       | Pubmed ID | Members                                                                                      | Comments                                                                      |
|------------------------------|---------------|-----------|----------------------------------------------------------------------------------------------|-------------------------------------------------------------------------------|
| 8AVRUHG76vkiFn2cZGICNZzr00Y= | grid          | 14759368  | CFT2, YSH1, PTA1, MPE1                                                                       | Part of mRNA cleavage/polyadenylation complex (4/10 proteins).                |
| 9yS57j/gbRb01NmmimsVeonoraA= | grid          | 14759368  | NUT1, MED7, MED4, SIN4, SRB4                                                                 | Part of mediator complex.                                                     |
| JU+Eokq6ipLh9DJKRtGRLUvT7vM= | grid,mint     | 14759368  | UBP6, RPT3, RPN9, RPT1, RPN8, RPN2, RPN7, RPN1                                               | Part of proteasome. MINT does not contain complexes from the original paper.  |
| HtTmhGiPyfIT2vFtRZ94uWw0rsY= | grid          | 16429126  | IOC3, HTB1, HTA2, HHF2, ISW1, KAP114, ITC1, RPS4A, VPS1, NAP1, RPO31, ISW2, TBF1, BRO1, MOT1 | Part of Complex # 99.                                                         |
| LnNzfYPGShcG7zkKynU6+fsK2eU= | grid          | 16429126  | PSK1, NTH1, BMH2, RTG2, BMH1                                                                 | Part of complex # 147 (two core proteins plus three attachments).             |
| S2I6VRjFMWC6rkkM+oYXwKCg9YQ= | grid          | 16429126  | RPL4B, MNN10, MN11, HOC1, MNN9, ANP1                                                         | Core complex (# 111 – mannan polymerase II) + one attachment protein (RPL4B). |
| 1fRmAapl2ruoQq202YUJg55maFo= | grid,mint     | 16554755  | RSM24, RSM28, MRPS5, MRP13, MRPS35, RSM27, RSM7, RSM25, MRPS17, MRPS12, RSM19, MRP4          | Part of complex # 1.                                                          |
| 5tBkYOmK/G1h3vaQmiOnUoBHHMQ= | grid,mint     | 16554755  | CFT2, YSH1, MPE1, PAPI                                                                       | Part of complex # 18.                                                         |
| 9f2DVj2rDGeCP53LHOnWRMwq14A= | grid,mint     | 16554755  | KAP95, RTT103, VMA2, RAI1, RAT1, RPB2, SRP1                                                  | True experimental association but not part of any derived complex.            |
| AVawv51+6Fqe3DquygD/XfyrXxE= | grid,mint     | 16554755  | RRP42, RRP45, RRP6, CSL4, MPP6, RRP4, LRP1, DDII                                             | Part of complex # 19.                                                         |
| NOLewovavMsFrQEdkSUT/mldeMc= | grid,mint     | 16554755  | CDC3, SHS1, CDC11, CDC12                                                                     | Part of complex # 121.                                                        |
| WA51i87Lj1wGp/EeF10V/YvbW1Y= | grid,mint     | 16554755  | GTT2, TRX1, CRN1, SSA3, IPP1, CMD1, TRX2, TDH1, RPL40B, CDC21, OYE2                          | True experimental association but not part of any derived complex.            |
| YN/hQXQvzoB5HqrgPzVth28mGsY= | grid,mint     | 16554755  | RRP43, RRP42, RRP45, RRP40, DIS3, RRP6, RRP4, LRP1                                           | Part of complex # 19.                                                         |
| 1LRk+AgI8HpGOSAgkhDzNJWSvtI= | grid          | 20489023  | RTG3, RTG2, TOR1, TOR2, CKA2, MYO2, MKS1, KOG1                                               | True experimental association.                                                |
| xWzvxeJFGqjkCihjmQVf5gZhJjQ= | dip,grid,mint | 20489023  | PUF3, SAM1, GCD6, SPT16, MTC1, YGK3, LSM12                                                   | True experimental association.                                                |

To partially investigate the fidelity of deflated complexes of type A and N, we randomly sampled 25 such complexes from the final ppiTrim yeast dataset and examined the original publications associated with them. This table contains 15 deflated complexes from high-throughput publications, while Supplementary Table 7 contains the complexes from low-throughput publications. Most of high-throughput papers referred to in this table present both the lists of bait-prey associations and of derived complexes. The complexes delated by ppiTrim are often derived from the former and form only parts of the latter. In the last column of this table, the complex numbers referred to are labels used by the publication's authors.

Supplementary Table 7: Randomly sampled deflated complexes from low-throughput publications

| ppiTrim Complex ID           | Sources | Pubmed ID | Members                                                                                              | Comments                                                                                                                                                  |
|------------------------------|---------|-----------|------------------------------------------------------------------------------------------------------|-----------------------------------------------------------------------------------------------------------------------------------------------------------|
| 15VfQtoe5gxGNwPSY3AG0sq6A2U= | grid    | 9891041   | CCR4, HPR1, PAF1, SRB5, GAL11                                                                        | NOT a true complex. This is because of bad annotation of PAF1–SRB5 interaction by the BioGRID. Completely opposite interpretation was given in the paper. |
| d79IdtwfTAENrH8CQ+c8CpS389Y= | grid    | 10329679  | YPT1, VPS21, YPT7, GDI1                                                                              | True complex. This is the only experiment in the paper.                                                                                                   |
| EtS4cgphEpTqJb/FS5qxyzf0ke8= | grid    | 11733989  | CDC39, CCR4, CDC36, CAF130, CAF120, POP2, NOT5, MOT2                                                 | True complex. CAF120 is an unusual member that could almost be left out.                                                                                  |
| 2kOyGdwzWywSpN5mhK26gCcC6LQ= | grid    | 14769921  | GBP2, IMD3, TEF1, KEM1, CTK2, CTK1, CTK3                                                             | True complex, except that TEF1 should be TEF2. This is an error in the iRefIndex source file; the BioGRID website has the correct assignment.             |
| Kd07BBUF07Sqy9NP3D01ixsS/TY= | grid    | 15303280  | BUD31, RPL2B, PRP19, CDC13, ATP1, RPS4A, SNU114, MDH1, MAM33, MRPL3, MRPL17, PRP8, PRP22, PAB1, BRR2 | True association                                                                                                                                          |
| ZAGz/IZqkEr3/NTDLzPEDAD9cKo= | grid    | 16179952  | CDC40, UFD1, SSM4, UBX2                                                                              | NOT a true complex, probably due to a typo in annotation. CDC40 cannot be found anywhere in the paper and should most likely be CDC48.                    |
| RDu0dsPAN0QEadfsU5sv05Ifihw= | grid    | 16286007  | SIN3, RCO1, RPD3, UME1, EAF3                                                                         | True complex.                                                                                                                                             |
| Vqbn3dDwTPgyE9DzbatFNqzdFe0= | grid    | 16615894  | VPS36, VPS25, VPS28, SNF8                                                                            | Vps28 binds the other three, which form a complex.                                                                                                        |
| lmdypAN9kaHBdasLWS19x8K7KkE= | grid    | 20159987  | UBI4, UFD2, PEX29, SSM4                                                                              | Biological association but indicated as ‘NOT a stable complex’ in the paper.                                                                              |
| aakRh6qVahGxGvqHe399+faxPvA= | grid    | 20655618  | PEX13, PEX10, PEX8, PEX12                                                                            | Association is correct, although mutant strain was used to obtain this particular complex.                                                                |

To partially investigate the fidelity of deflated complexes of type A and N, we randomly sampled 25 such complexes from the final ppiTrim yeast dataset and examined the original publications associated with them. This table contains 10 deflated complexes from low-throughput publications, while Supplementary Table 6 contains the complexes from high-throughput publications.

Supplementary Table 8: Summary of resolvable conflicts

| Consolidated terms                                                                                                                                        | Count |
|-----------------------------------------------------------------------------------------------------------------------------------------------------------|-------|
| MI:0018 (two hybrid), MI:0045 (experimental interaction detection), MI:0398 (two hybrid pooling approach), MI:0399 (two hybrid fragment pooling approach) | 3959  |
| MI:0090 (protein complementation assay), MI:0111 (dihydrofolate reductase reconstruction)                                                                 | 2612  |
| MI:0090 (protein complementation assay), MI:0112 (ubiquitin reconstruction)                                                                               | 2077  |
| MI:0004 (affinity chromatography technology), MI:0676 (tandem affinity purification)                                                                      | 1840  |
| MI:0004 (affinity chromatography technology), MI:0007 (anti tag coimmunoprecipitation)                                                                    | 1408  |
| MI:0018 (two hybrid), MI:0045 (experimental interaction detection), MI:0397 (two hybrid array)                                                            | 1231  |
| MI:0018 (two hybrid), MI:0045 (experimental interaction detection)                                                                                        | 954   |
| MI:0018 (two hybrid), MI:0397 (two hybrid array)                                                                                                          | 914   |
| MI:0045 (experimental interaction detection), MI:0686 (unspecified method)                                                                                | 628   |
| MI:0004 (affinity chromatography technology), MI:0019 (coimmunoprecipitation)                                                                             | 598   |
| MI:0018 (two hybrid), MI:0398 (two hybrid pooling approach)                                                                                               | 506   |
| MI:0004 (affinity chromatography technology), MI:0007 (anti tag coimmunoprecipitation), MI:0676 (tandem affinity purification)                            | 444   |
| MI:0018 (two hybrid), MI:0045 (experimental interaction detection), MI:0686 (unspecified method)                                                          | 320   |
| MI:0004 (affinity chromatography technology), MI:0096 (pull down)                                                                                         | 217   |
| MI:0415 (enzymatic study), MI:0424 (protein kinase assay)                                                                                                 | 192   |
| MI:0045 (experimental interaction detection), MI:0081 (peptide array)                                                                                     | 150   |
| MI:0045 (experimental interaction detection), MI:0676 (tandem affinity purification)                                                                      | 120   |
| MI:0492 (in vitro), MI:0493 (in vivo)                                                                                                                     | 5739  |
| MI:0018 (two hybrid), MI:0398 (two hybrid pooling approach)                                                                                               | 5394  |
| MI:0018 (two hybrid), MI:0492 (in vitro), MI:0493 (in vivo)                                                                                               | 2796  |
| MI:0096 (pull down), MI:0492 (in vitro), MI:0493 (in vivo)                                                                                                | 2760  |
| MI:0096 (pull down), MI:0492 (in vitro)                                                                                                                   | 2134  |
| MI:0018 (two hybrid), MI:0492 (in vitro)                                                                                                                  | 1658  |
| MI:0018 (two hybrid), MI:0493 (in vivo)                                                                                                                   | 1193  |
| MI:0018 (two hybrid), MI:0397 (two hybrid array)                                                                                                          | 1045  |
| MI:0096 (pull down), MI:0493 (in vivo)                                                                                                                    | 513   |
| MI:0004 (affinity chromatography technology), MI:0006 (anti bait coimmunoprecipitation)                                                                   | 384   |
| MI:0004 (affinity chromatography technology), MI:0019 (coimmunoprecipitation)                                                                             | 309   |
| MI:0004 (affinity chromatography technology), MI:0007 (anti tag coimmunoprecipitation)                                                                    | 195   |
| MI:0114 (x-ray crystallography), MI:0492 (in vitro)                                                                                                       | 166   |
| MI:0004 (affinity chromatography technology), MI:0096 (pull down)                                                                                         | 161   |
| MI:0047 (far western blotting), MI:0492 (in vitro), MI:0493 (in vivo)                                                                                     | 106   |
| MI:0018 (two hybrid), MI:0398 (two hybrid pooling approach)                                                                                               | 17738 |
| MI:0018 (two hybrid), MI:0399 (two hybrid fragment pooling approach)                                                                                      | 1426  |

All resolvable conflicts with counts of more than 100 for yeast (top), human (middle) and fruitfly (bottom) datasets are shown.
